# Supplementary material
Source: Springer Nature journal article supplement (https://www.springermedizin.de/resource/supplementary/13063_2009_395_MOESM2_ESM.pdf/9617894)
Supplement: MOESM2 [file 9617894]

Blood loss > 20% of blood volume or intention to give FFP →  
PT + Tc randomisation

Tc ≤ 50'000

No bleeding in  
PACU

surgery in  
process or  
bleeding (PACU)

Tc > 50'000 + signs of  
massive bleeding or  
patient on Tc inhibitors

1 unit Tc

Tc > 50'000

Next control according clinical judgment and blood loss
